# Supplementary material for: Genome-wide characteristics of de novo mutations in autism
Source: PubMed Central journal article supplement (PMC4980121; doi:10.1038/npjgenmed.2016.27), 2016-08-03

Supplementary Figure 1

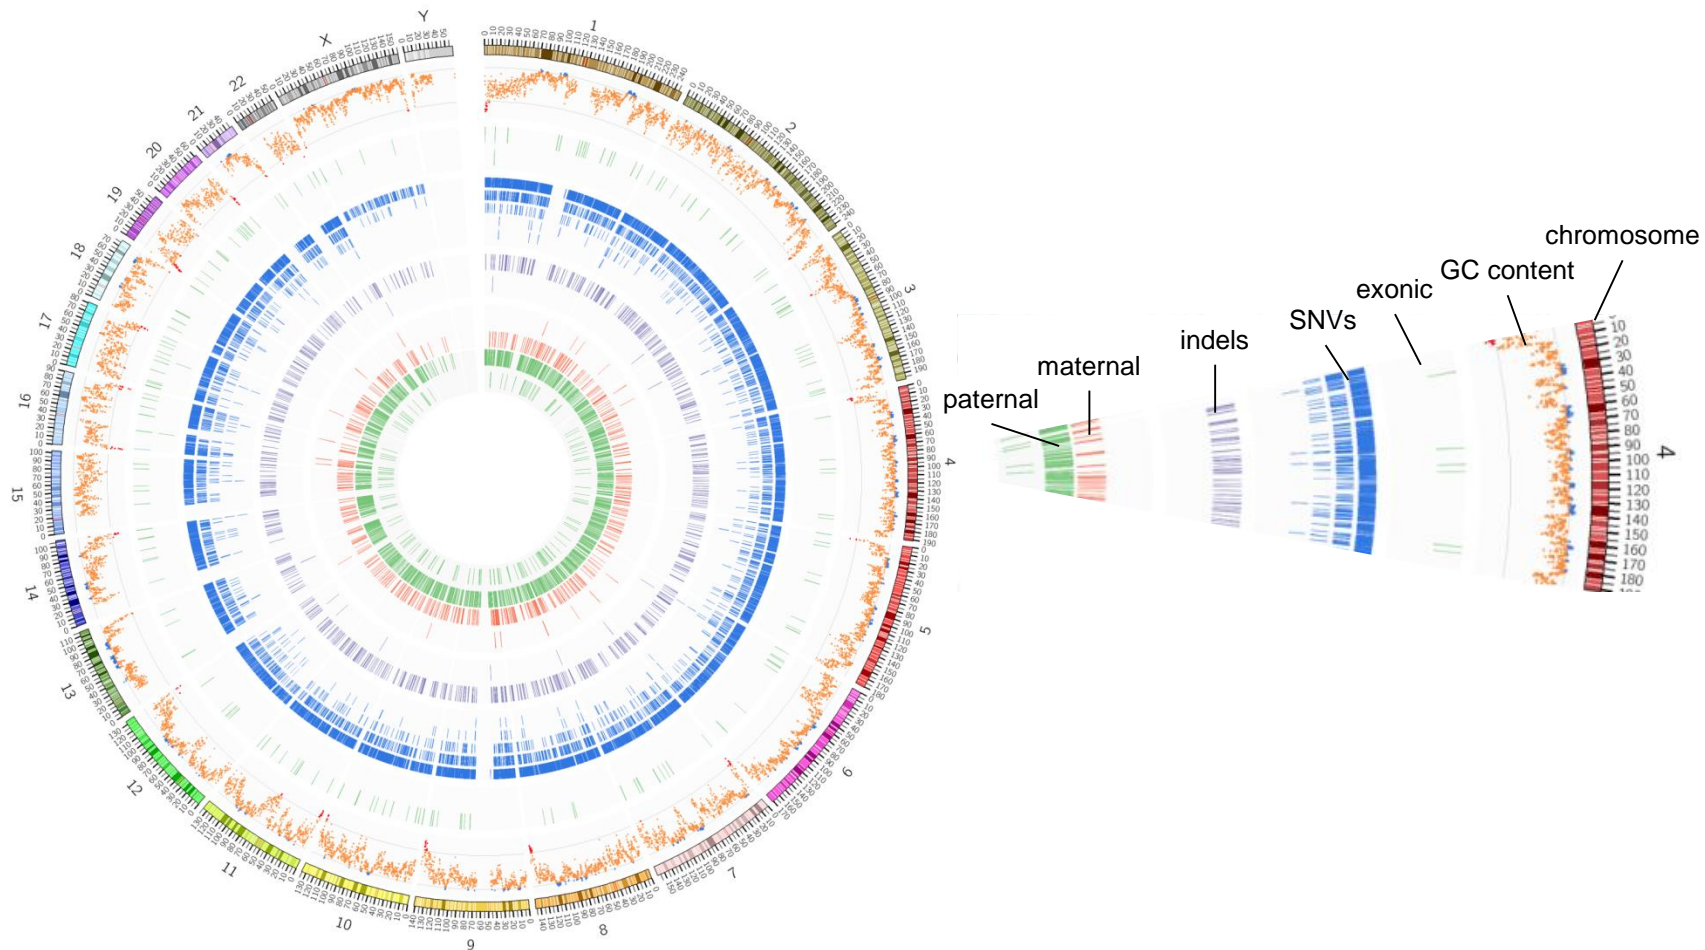

Supplementary Figure 2

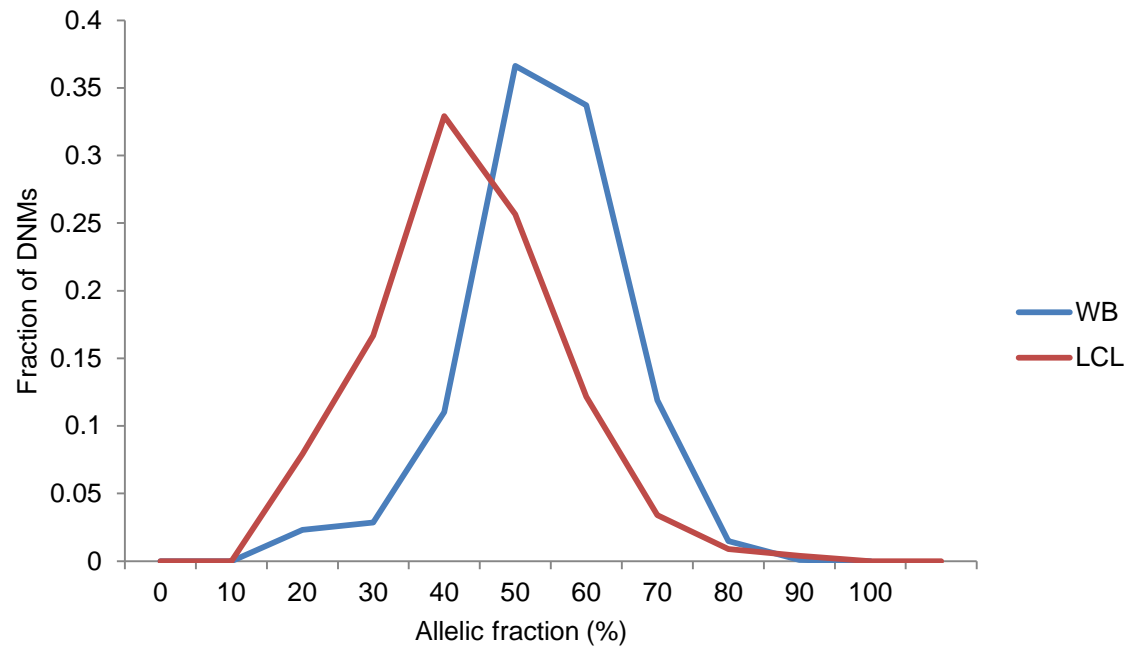

Supplementary Figure 3

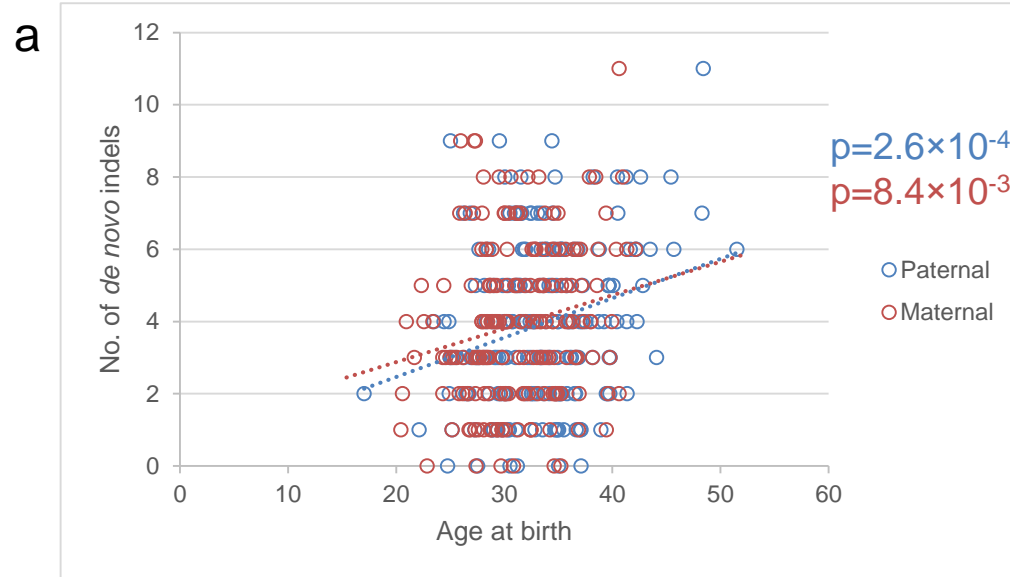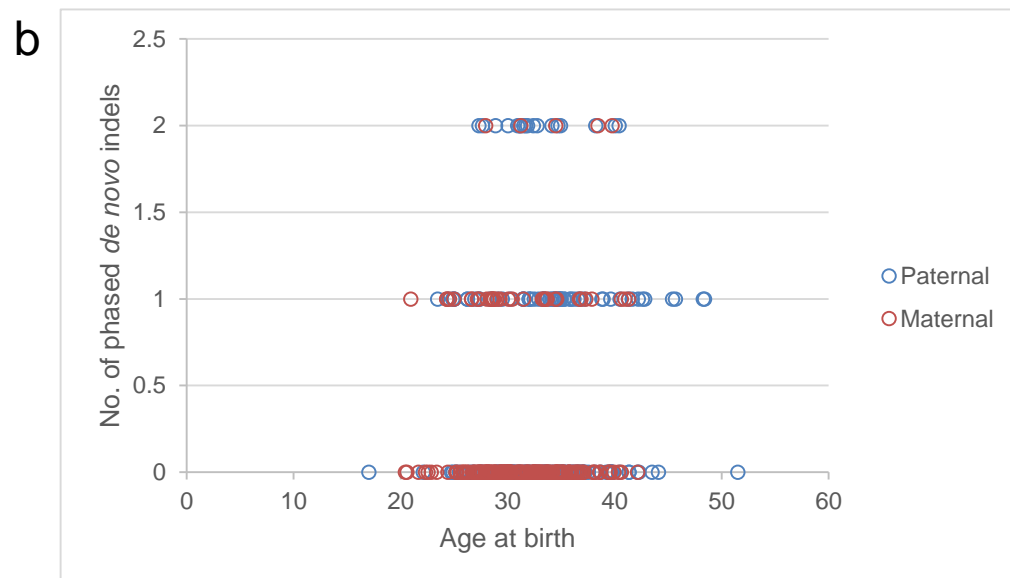

Supplementary Figure 4

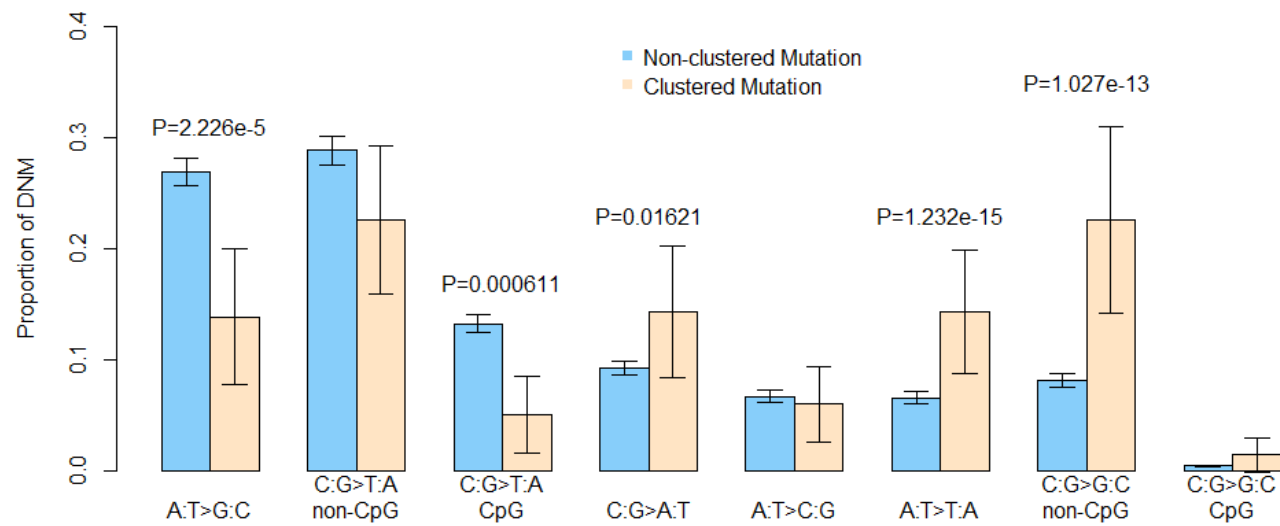



Supplementary Figure 6

a

### ASD200

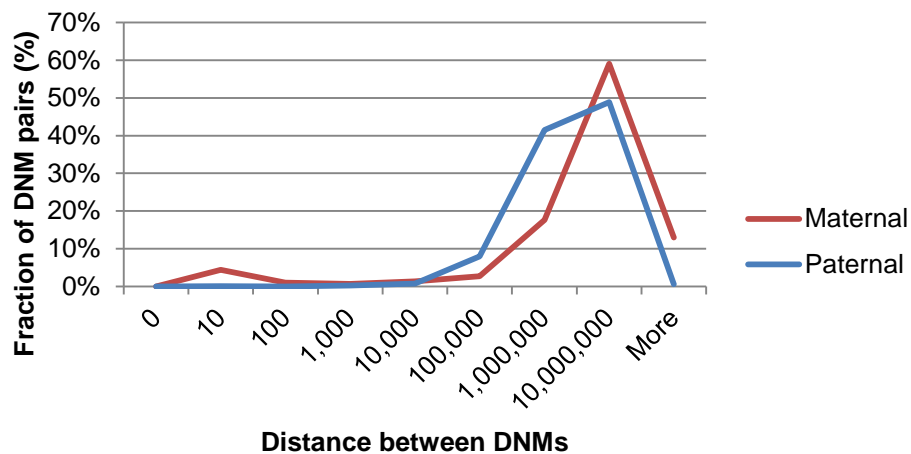

b

### CG140

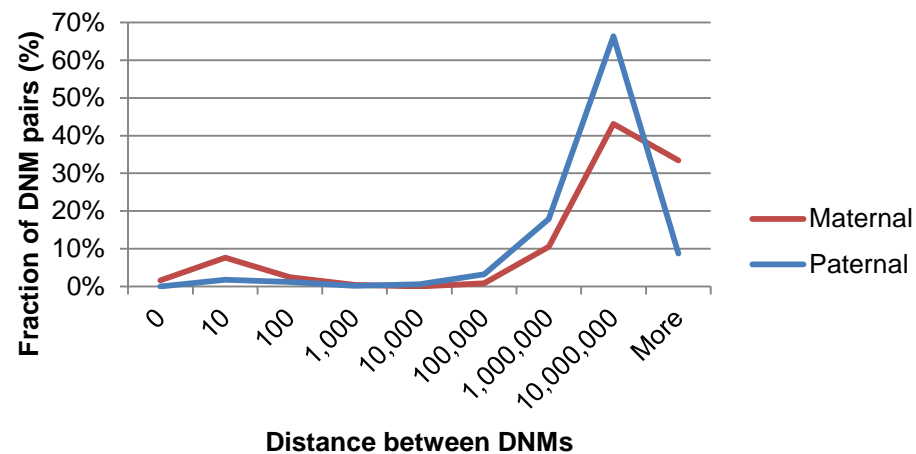

c

### Dutch

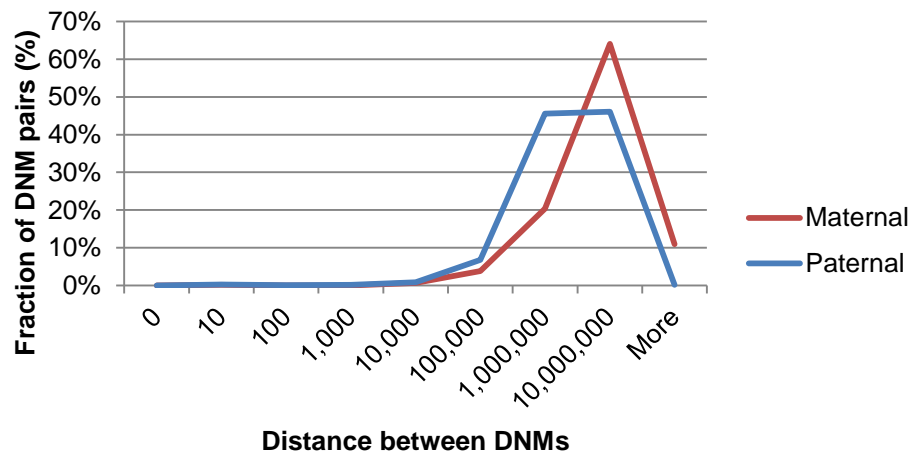

# Supplementary Figure 7

a

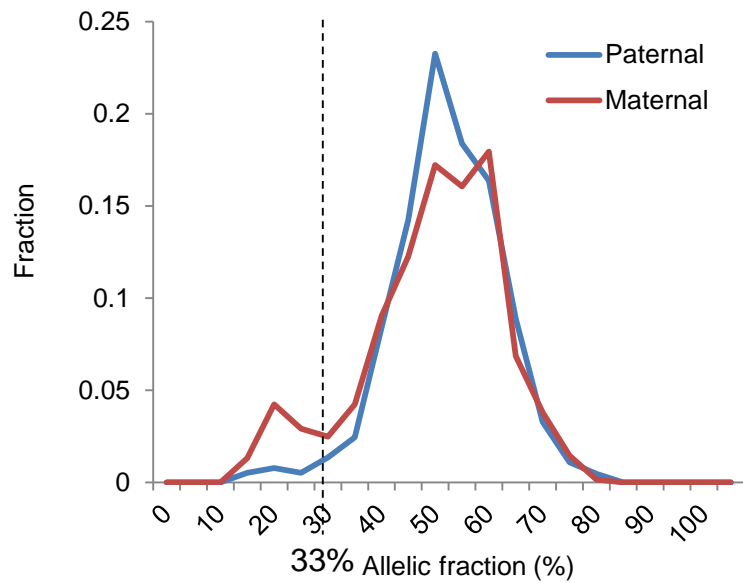

b

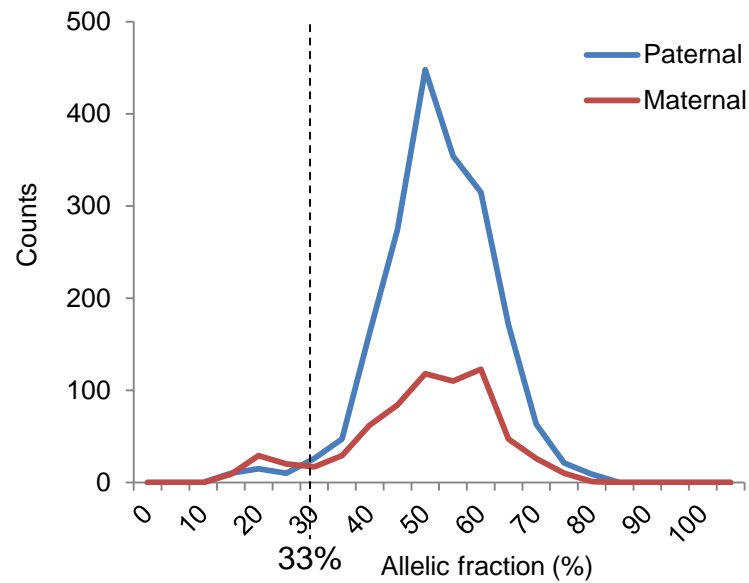

# Supplementary Figure 8

a

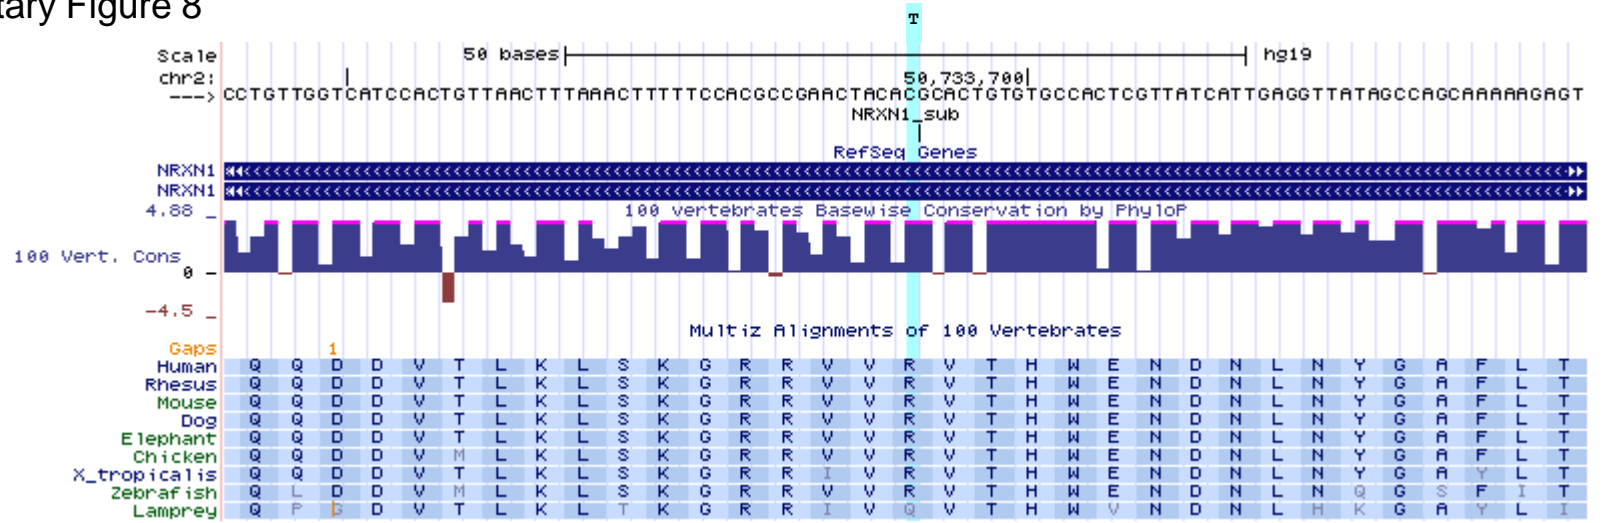

b

1-0375-001 mother

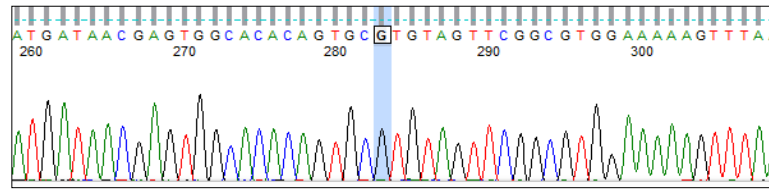

1-0375-002 father

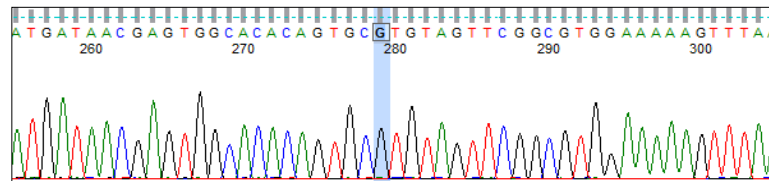

1-0375-003 proband

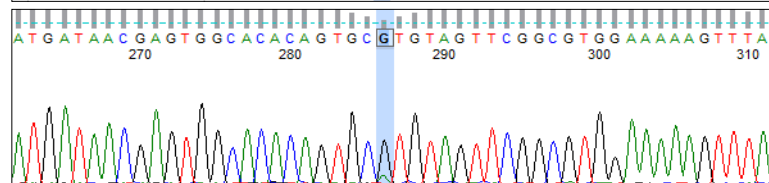

c

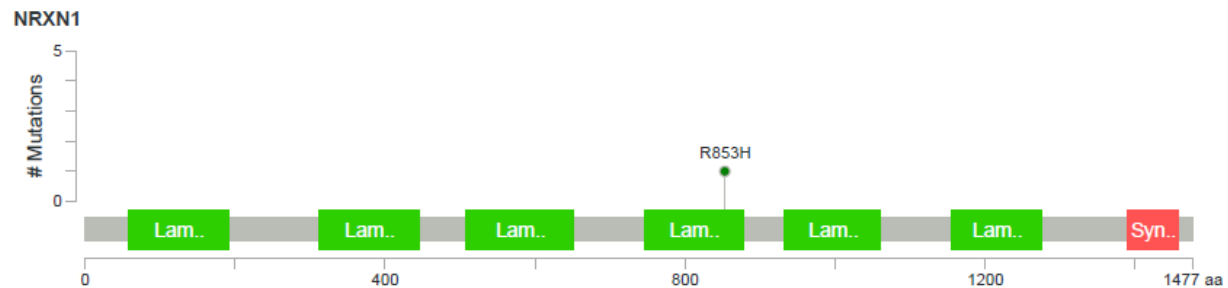



# Supplementary Figure 9

**a**

|                   | ASD somatic (25%) | ASD somatic (33%) | ASD  | GoNL | Kong | CG   | ASD LCL | CG LCL |
|-------------------|-------------------|-------------------|------|------|------|------|---------|--------|
| ASD somatic (25%) | -                 | 0.56              | 0.56 | 0.54 | 0.58 | 0.55 | 0.45    | 0.53   |
| ASD somatic (33%) |                   | -                 | 0.64 | 0.61 | 0.64 | 0.40 | 0.40    | 0.60   |
| ASD               |                   |                   | -    | 0.94 | 0.84 | 0.83 | 0.36    | 0.62   |
| GoNL              |                   |                   |      | -    | 0.77 | 0.73 | 0.32    | 0.59   |
| Kong              |                   |                   |      |      | -    | 0.96 | 0.45    | 0.72   |
| CG                |                   |                   |      |      |      | -    | 0.40    | 0.67   |
| ASD LCL           |                   |                   |      |      |      |      | -       | 0.81   |
| CG LCL            |                   |                   |      |      |      |      |         | -      |

**b**

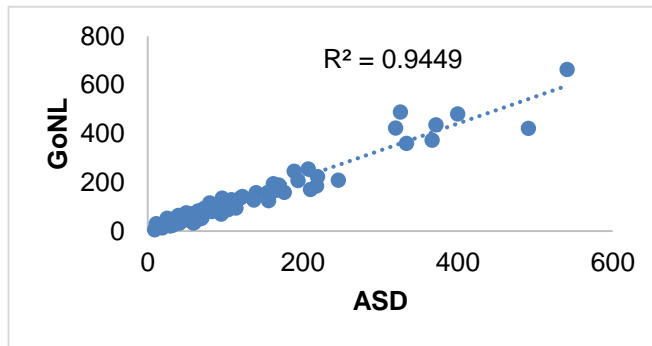

**c**

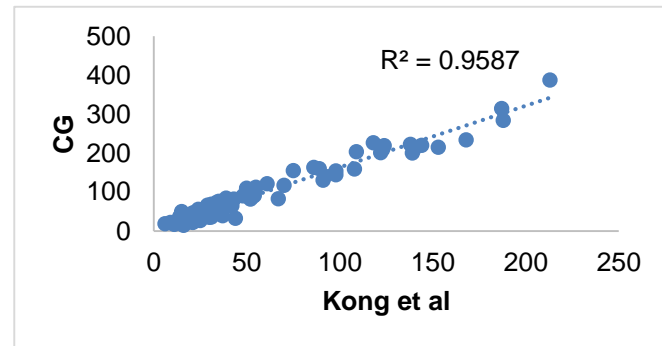

**d**

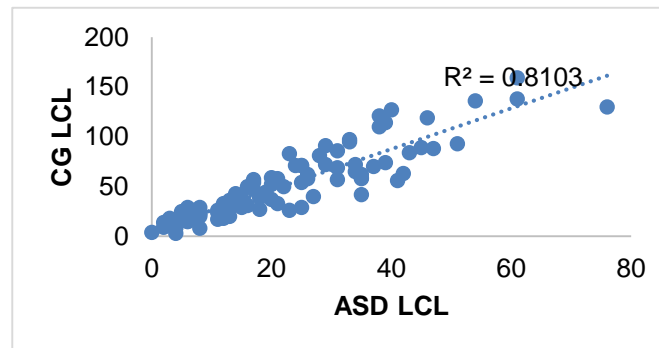

Supplementary Figure 10

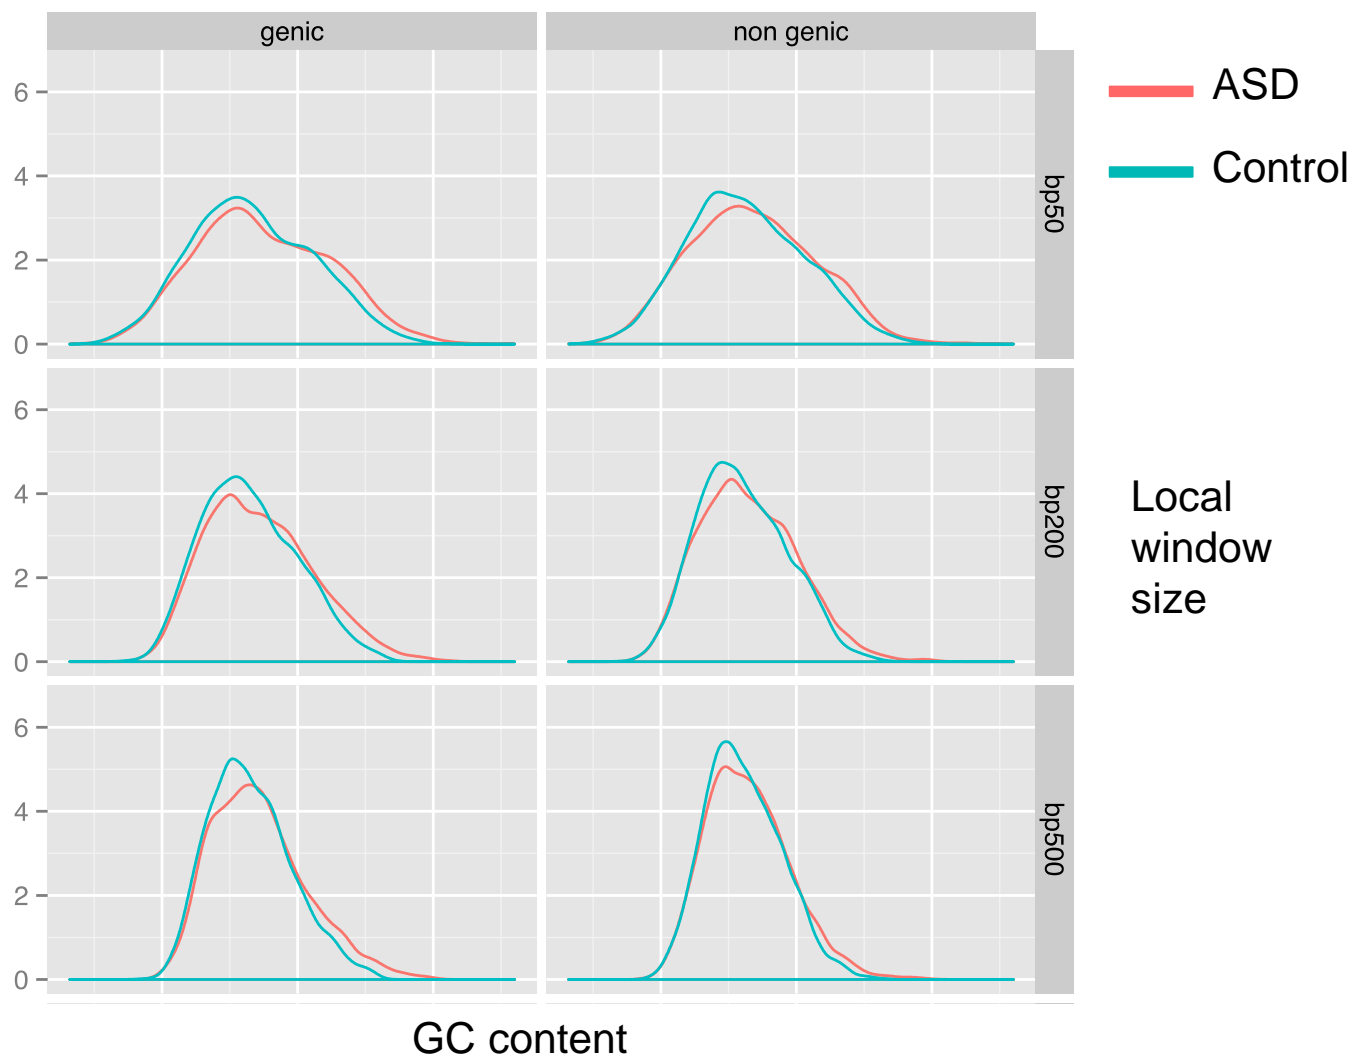

# Supplementary Figure 11

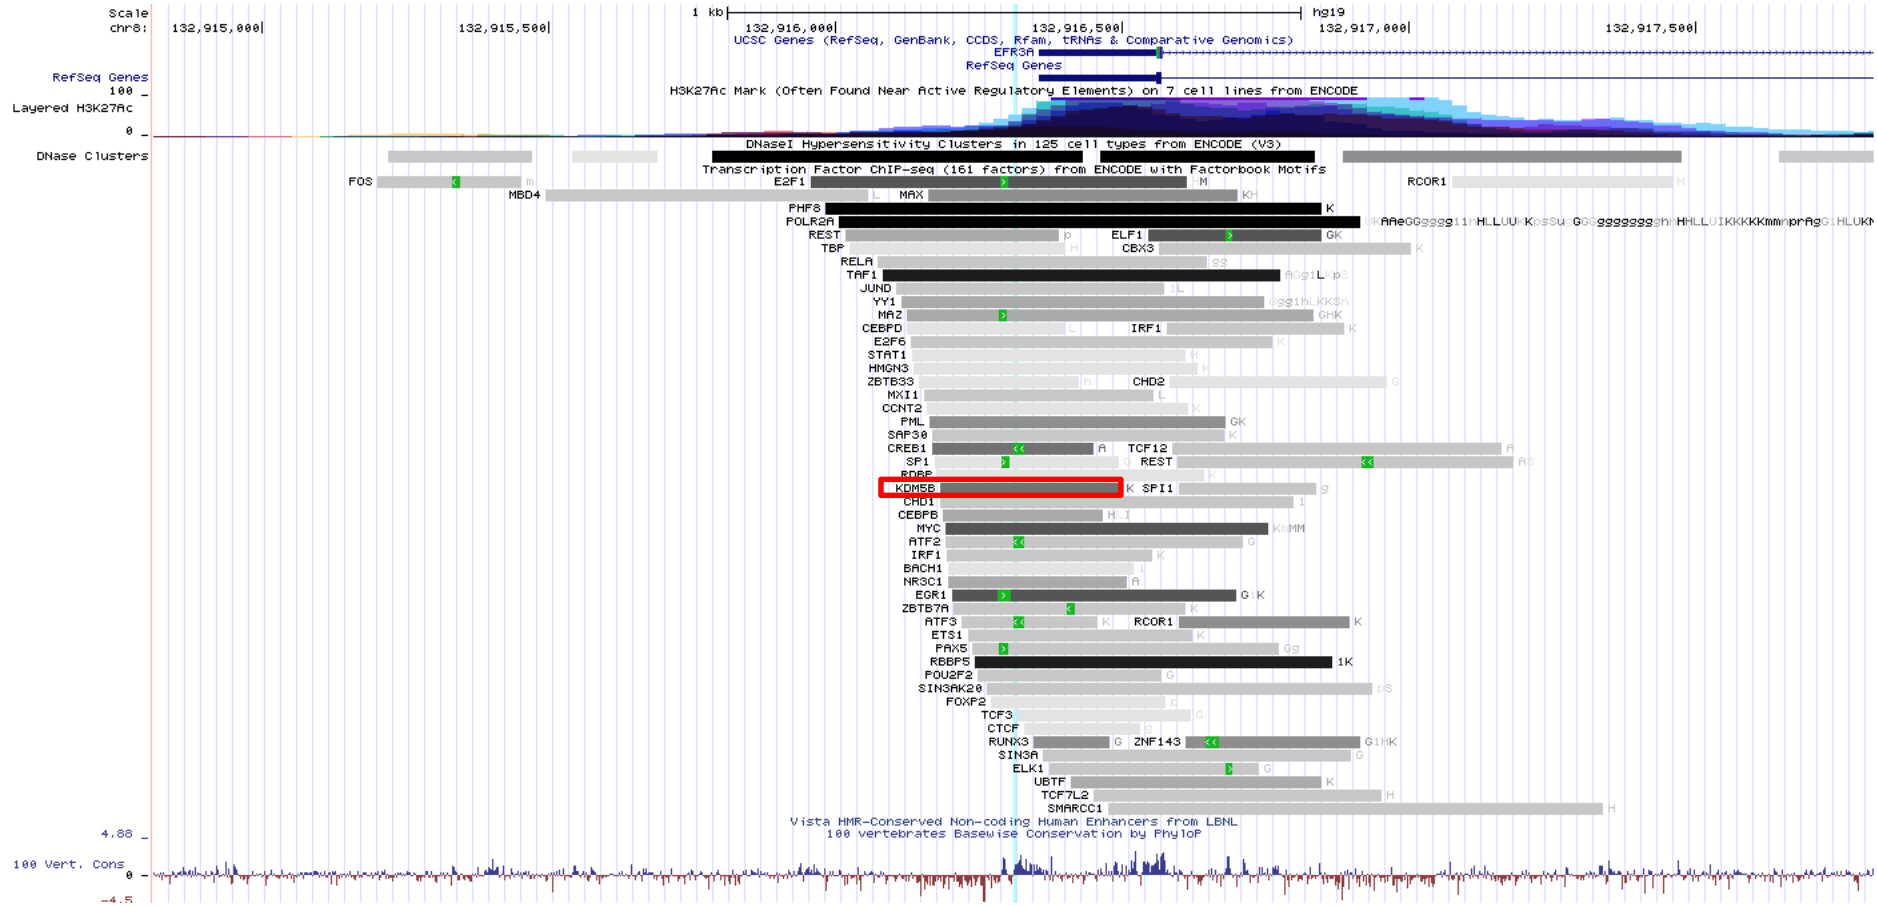

Supplementary Figure 12

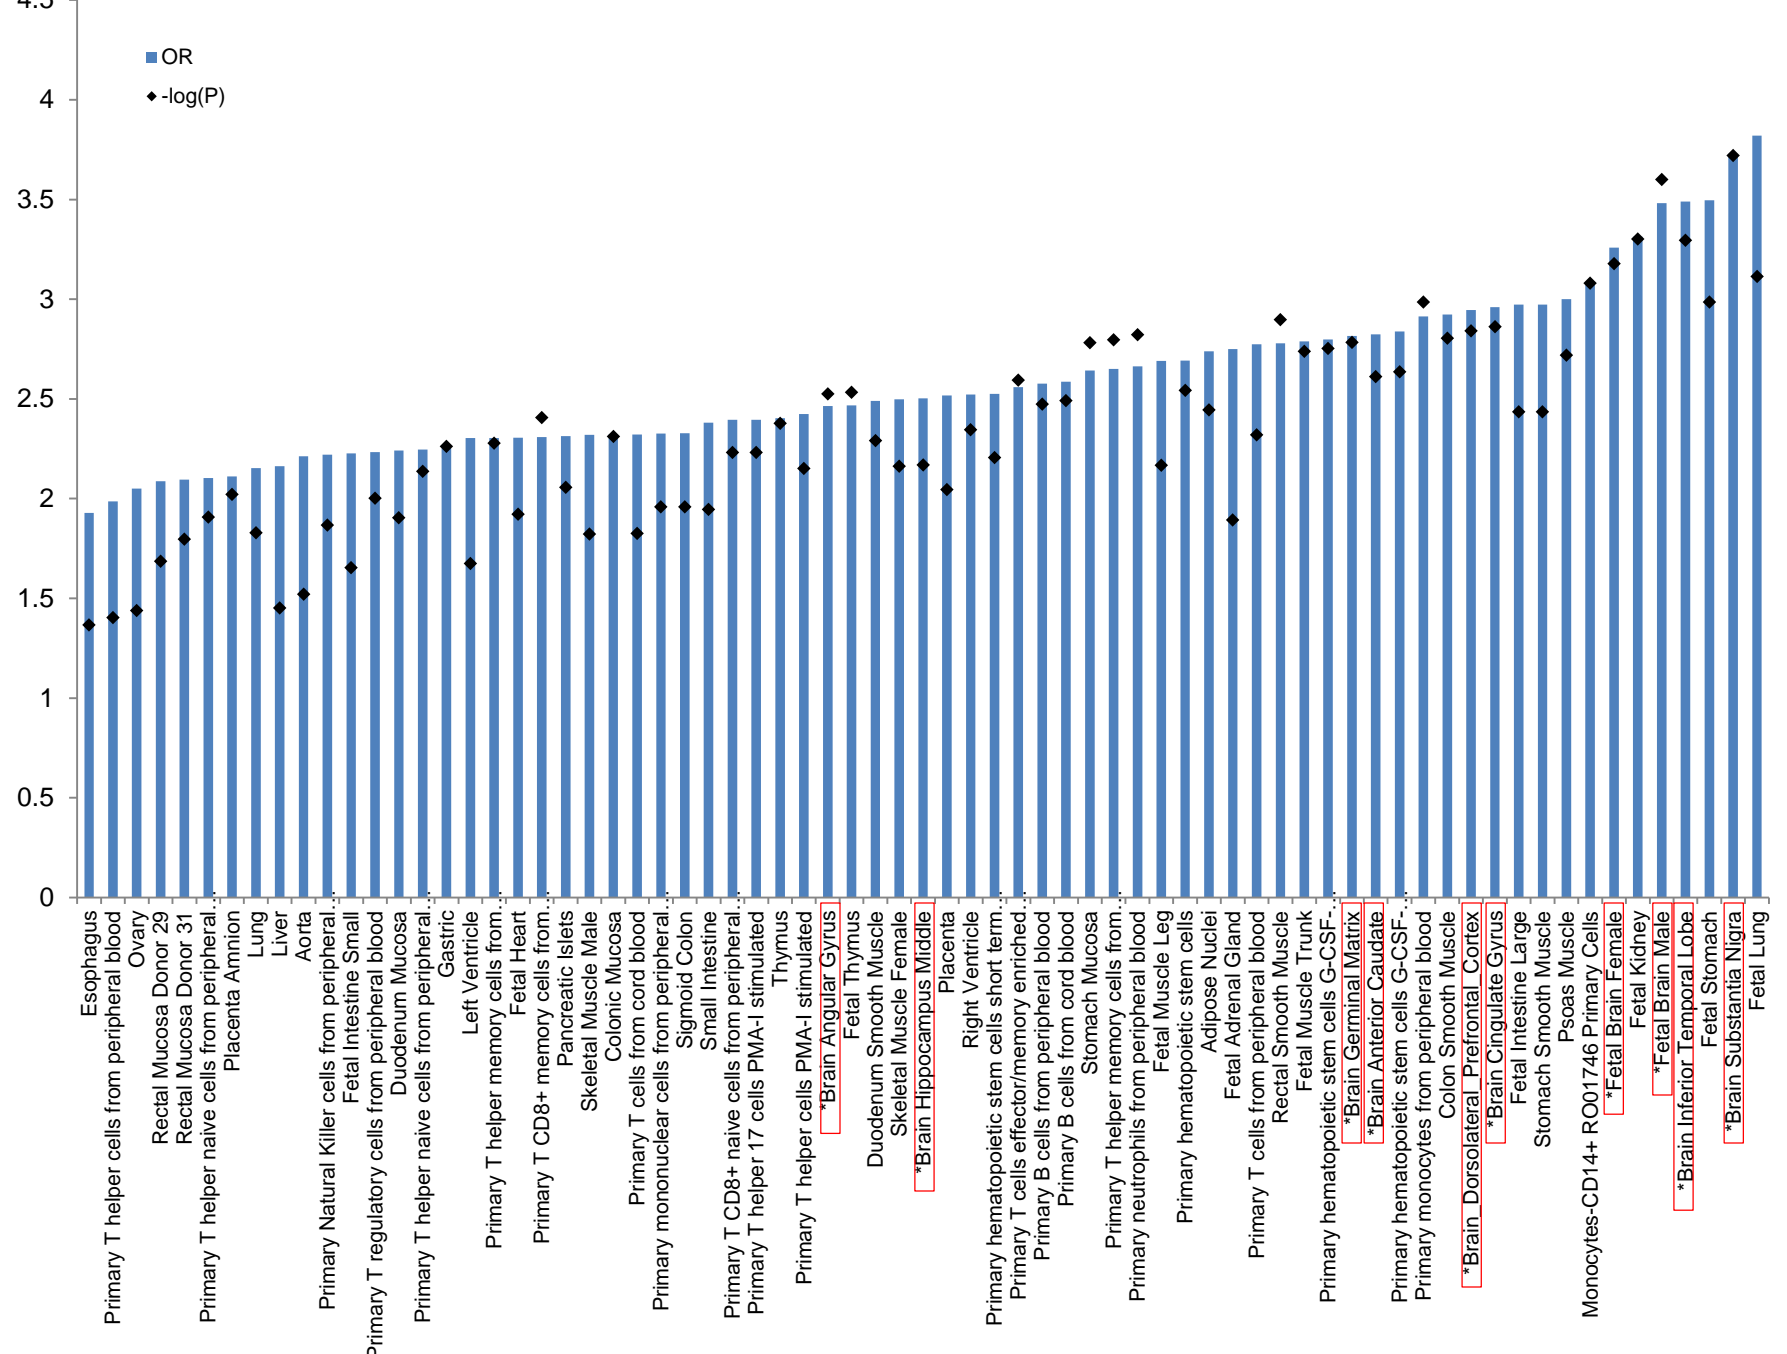

Supplementary Figure 13

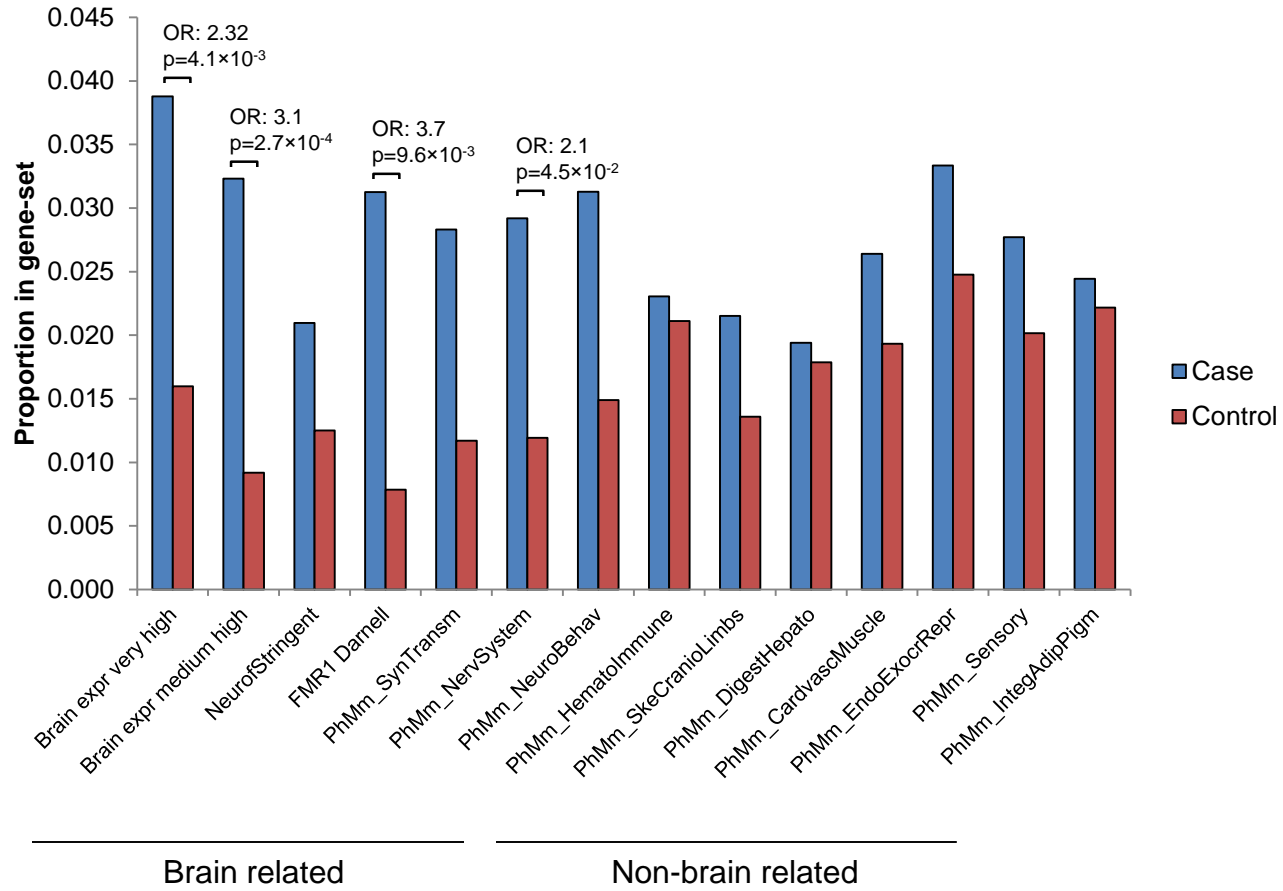

# PC12

FDR

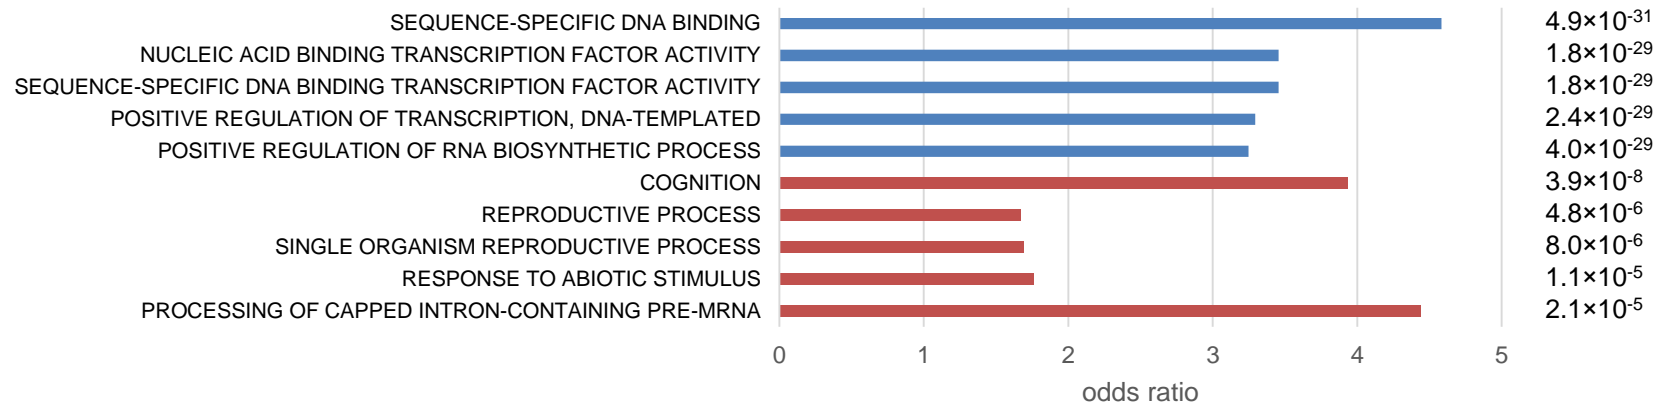

# Supplementary Figure 15

**a**

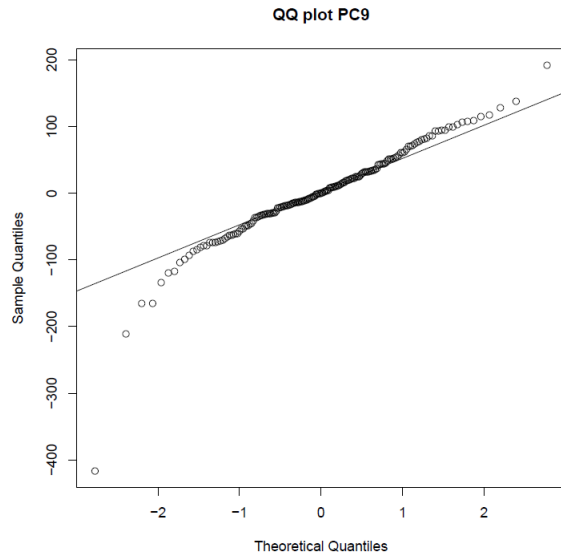

**b**

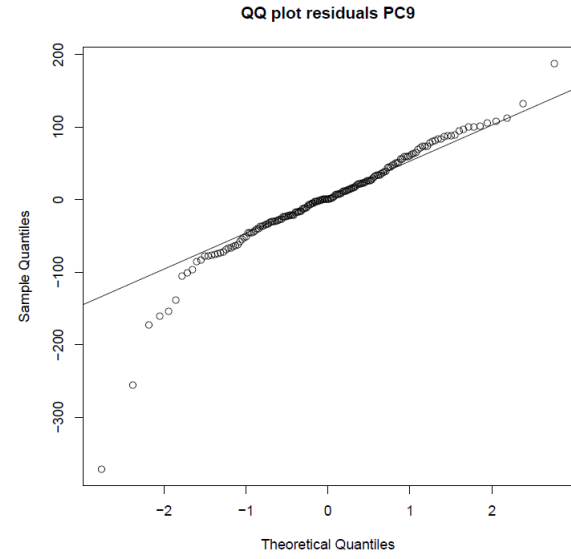

**c**

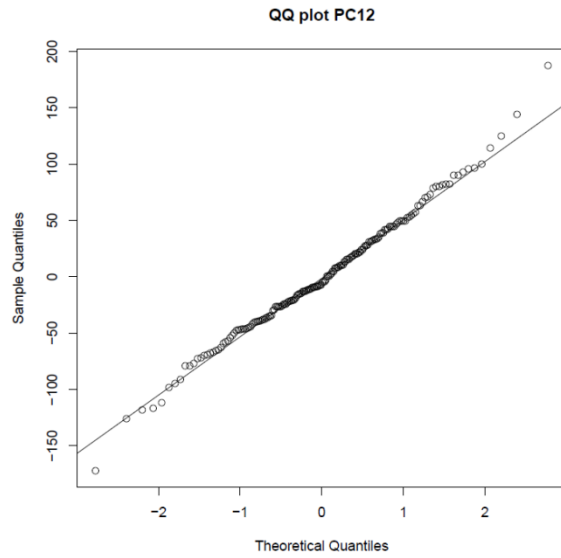

**d**

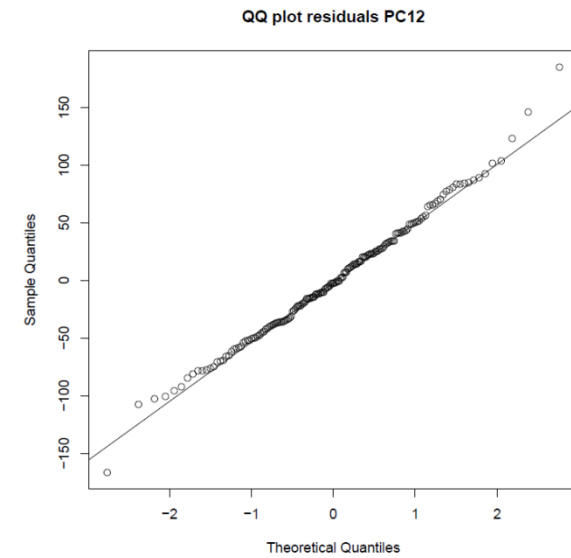

Supplement: NIHMS5778-supplement-Supplementary_figures.pdf [file NIHMS5778-supplement-Supplementary_figures.pdf]
